# Supplementary material for: Orographic resolution driving the improvements associated with horizontal resolution increase in the Northern Hemisphere winter mid-latitudes
Source: Copernicus journal article supplement (doi:10.5194/wcd-3-535-2022), 2022-05-10
Supplement: Supplementary file 1 [file wcd-3-535-2022-supplement.pdf]

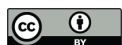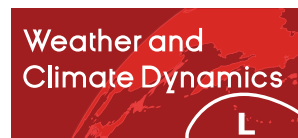

Open Access

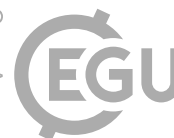

*Supplement of*

## **Orographic resolution driving the improvements associated with horizontal resolution increase in the Northern Hemisphere winter mid-latitudes**

**Paolo Davini et al.**

*Correspondence to:* Paolo Davini (p.davini@isac.cnr.it)

The copyright of individual parts of the supplement might differ from the article licence.

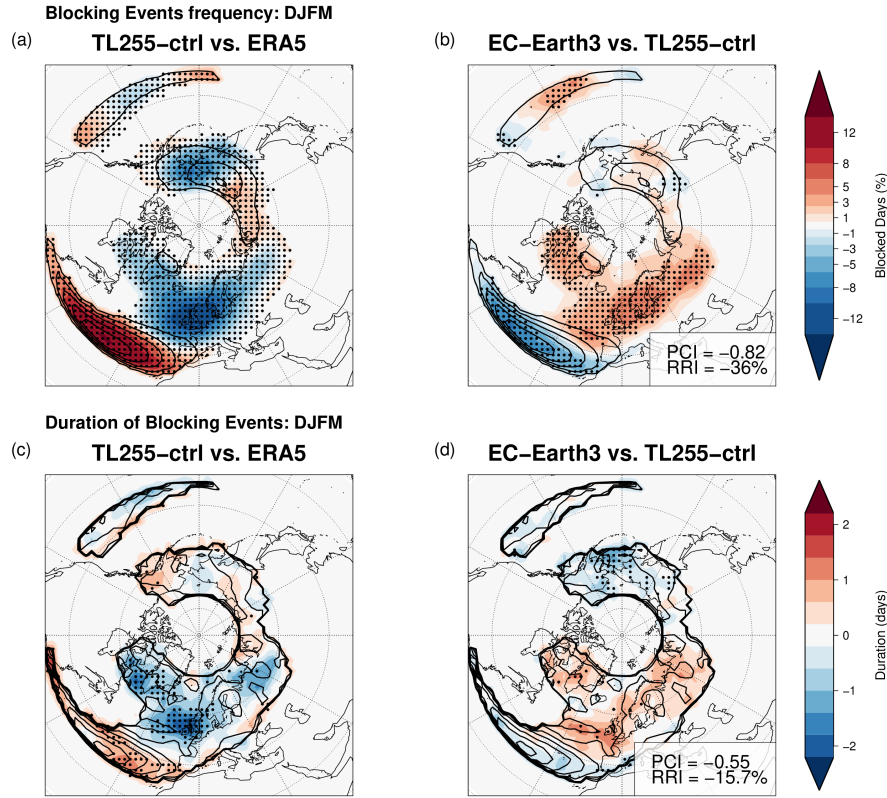

**Figure S1.** DJFM blocking events frequency (top row) and blocking events duration (bottom row) for (a,d) EC-Earth3 TL255-ctrl bias with respect to ERA5 (b,e) changes induced by the activation of the orographic parametrizations at TL255. For blocking frequency, contours are drawn every 5%. For blocking duration, contours are drawn every 0.5 days.

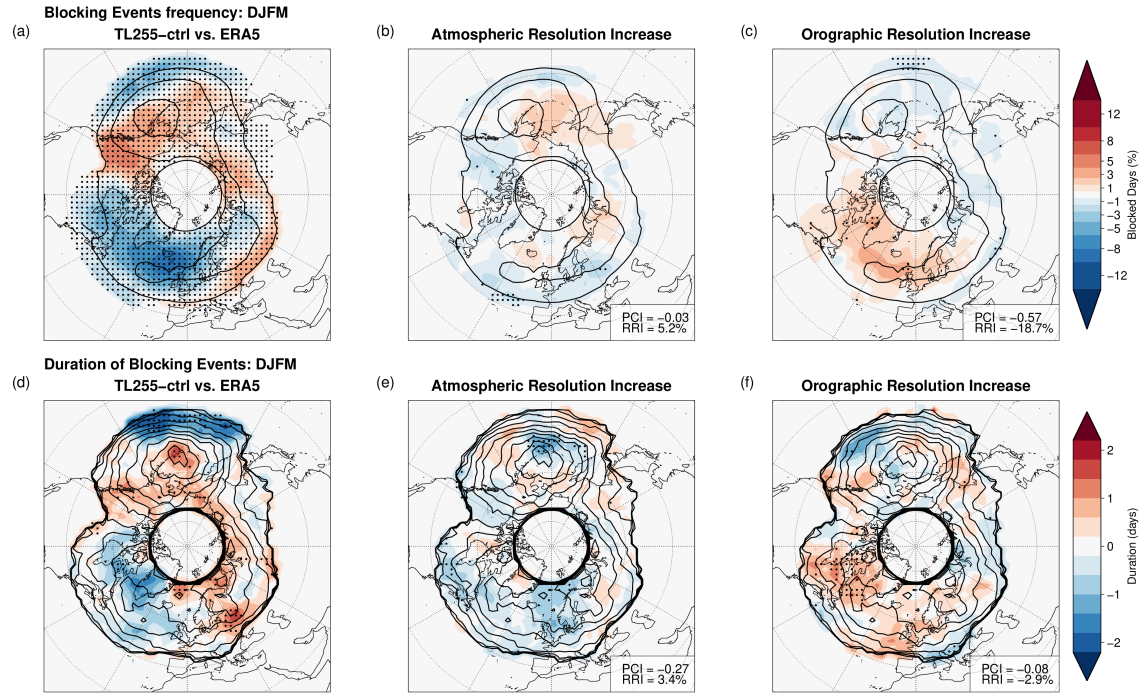

**Figure S2.** As Figure 5 from the main manuscript, but using an instantaneous blocking index based on Schwierz et al. (2004)

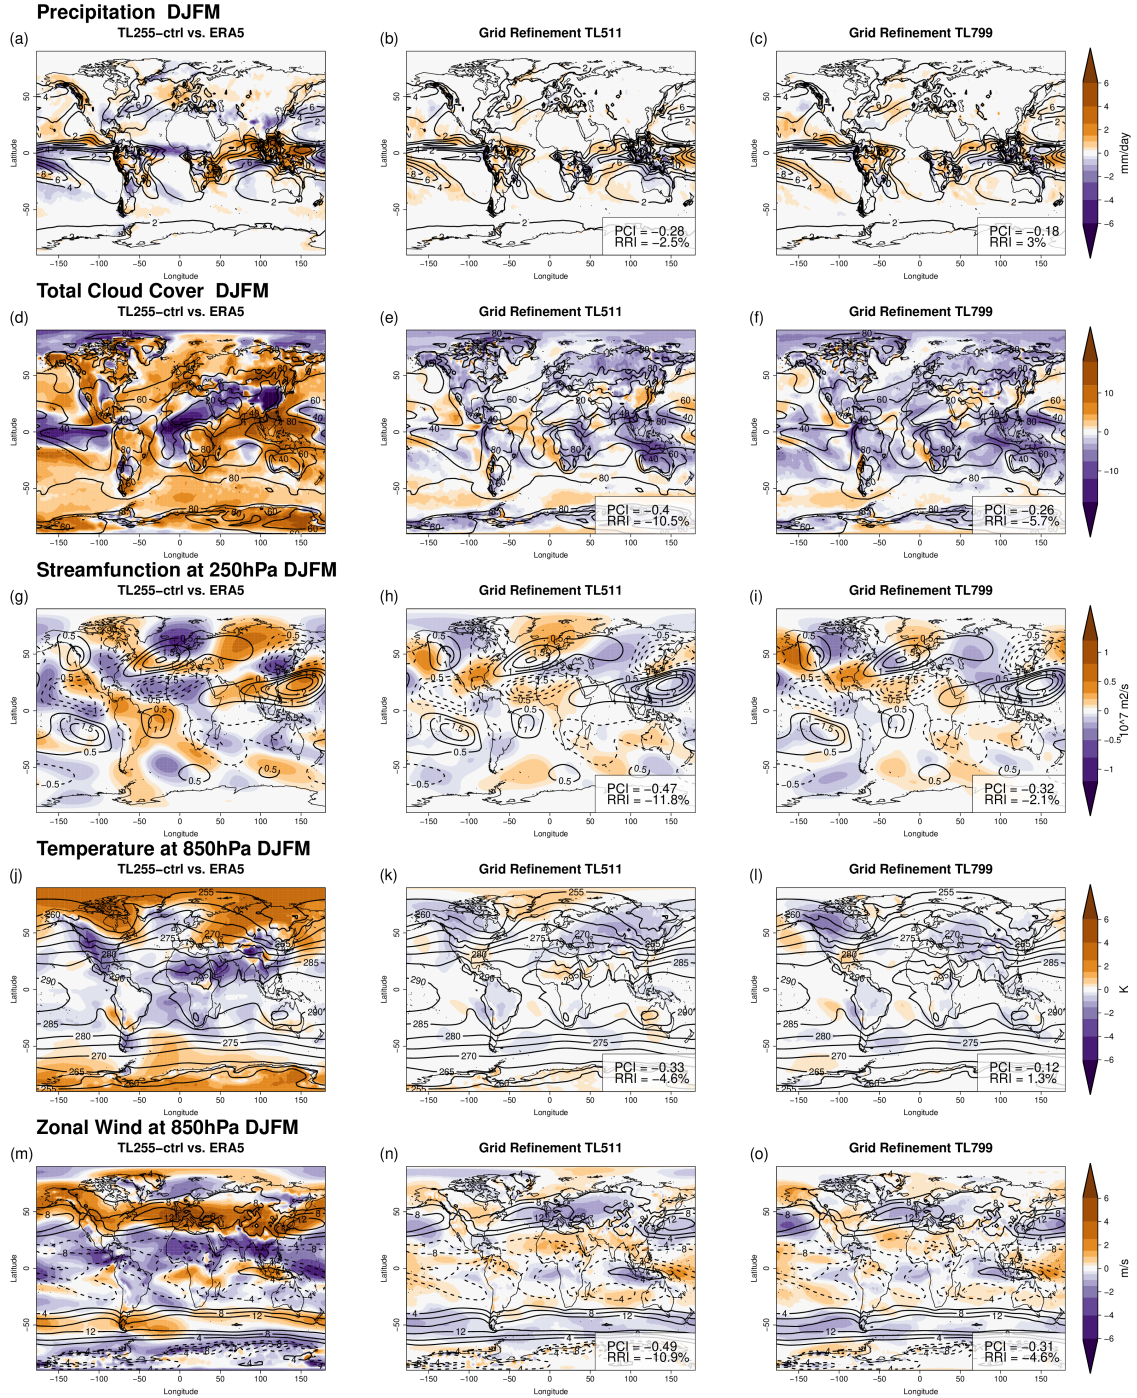

**Figure S3.** As Figure 2 from the main manuscript, but for showing the impact of grid refinement at TL511 (i.e. TL511-orog255 minus TL255-ctrl) and TL799 (i.e. TL799-orog255 minus TL255-ctrl) for precipitation, total cloud cover, streamfunction at 250hPa, temperature at 850hPa and zonal wind at 850hPa.



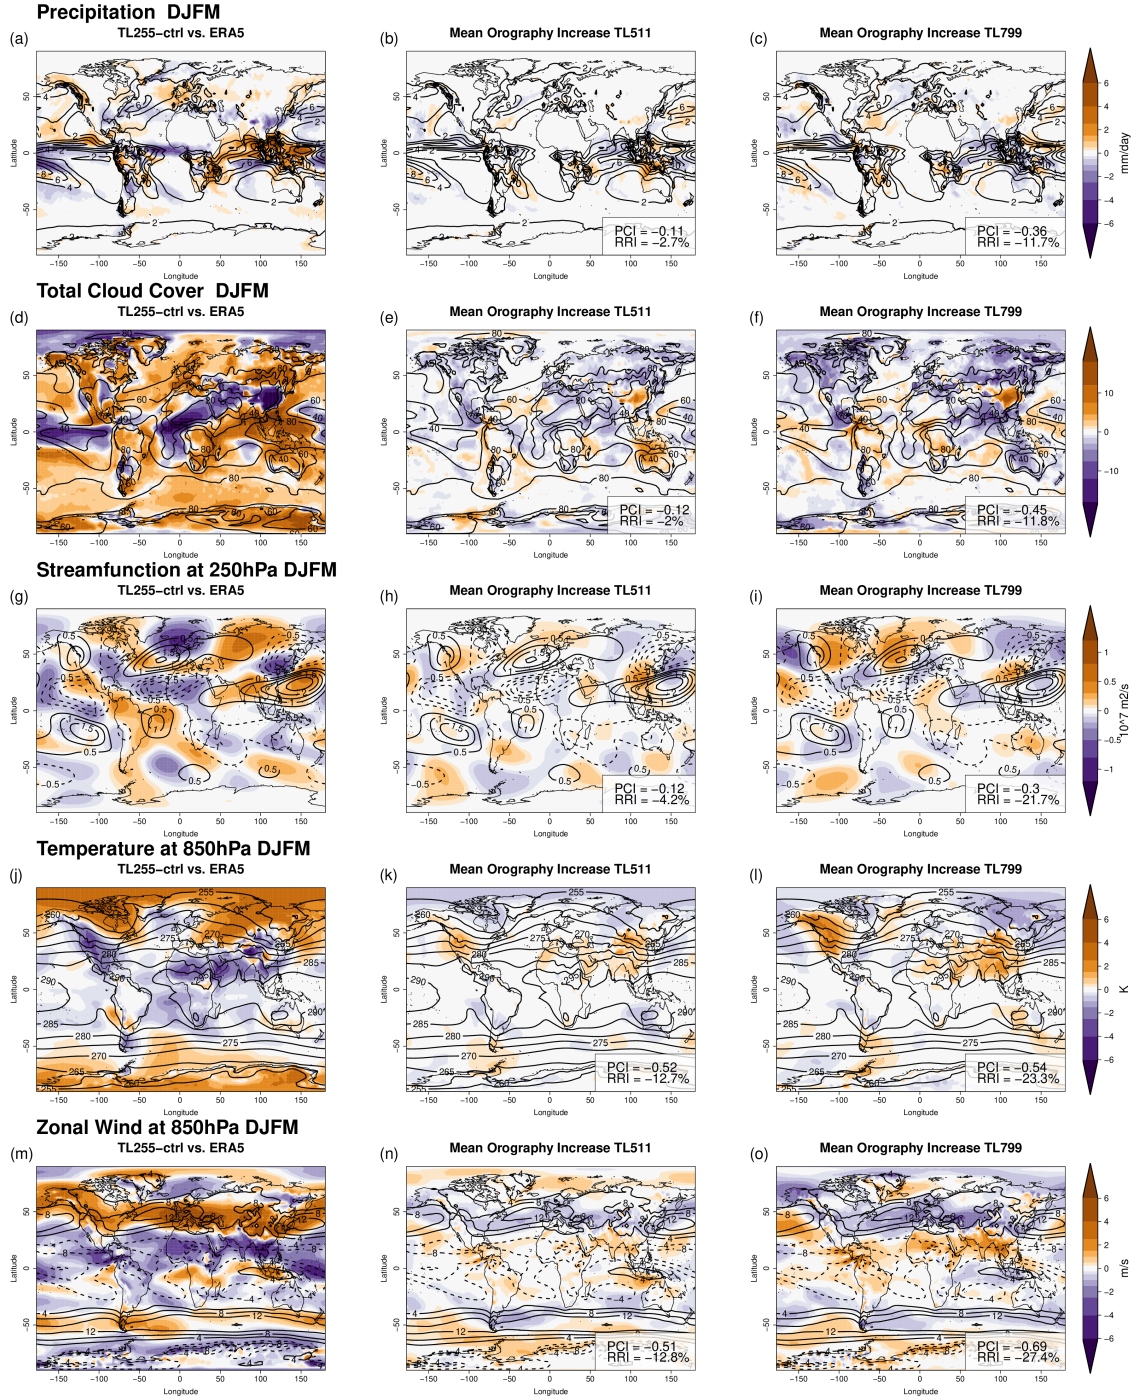

**Figure S4.** As Figure 2 from the main manuscript, but for showing the impact of orography refinement at TL511 (i.e. TL511-ctrl minus TL511-orog255) and TL799 (i.e. TL799-ctrl minus TL799-orog255) for precipitation, total cloud cover, streamfunction at 250hPa, temperature at 850hPa and zonal wind at 850hPa.
